# Supplementary material for: Impact of Incorporating Future Mandatory Price Reductions with Generic Drug Entry on the Cost-Effectiveness of New Drugs: A Policy Simulation Study of Dupilumab in Atopic Dermatitis Treatment
Source: MDPI journal article supplement (doi:10.3390/healthcare12090938), 2024-05-02
Supplement: s1 [file s1]

## **Supplementary Materials**

**Title : Impact of Incorporating Future Mandatory Price Reductions with Generic Drug Entry on the Cost-Effectiveness of New Drugs: A Policy Simulation Study of Dupilumab in Atopic Dermatitis Treatment**

**Journal: Healthcare**

**Supplementary Table S1. CHEERS 2022 Checklist**

| Topic                                | No. | Item                                                                                                                            | Location where item is reported                                                           |
|--------------------------------------|-----|---------------------------------------------------------------------------------------------------------------------------------|-------------------------------------------------------------------------------------------|
| <b>Title</b>                         |     |                                                                                                                                 |                                                                                           |
|                                      | 1   | Identify the study as an economic evaluation and specify the interventions being compared.                                      | Title                                                                                     |
| <b>Abstract</b>                      |     |                                                                                                                                 |                                                                                           |
|                                      | 2   | Provide a structured summary that highlights context, key methods, results, and alternative analyses.                           | Abstract                                                                                  |
| <b>Introduction</b>                  |     |                                                                                                                                 |                                                                                           |
| <b>Background and objectives</b>     | 3   | Give the context for the study, the study question, and its practical relevance for decision making in policy or practice.      | Introduction                                                                              |
| <b>Materials and Methods</b>         |     |                                                                                                                                 |                                                                                           |
| <b>Health economic analysis plan</b> | 4   | Indicate whether a health economic analysis plan was developed and where available.                                             | Materials and Methods;<br>Model Structure                                                 |
| <b>Study population</b>              | 5   | Describe characteristics of the study population (such as age range, demographics, socioeconomic, or clinical characteristics). | Materials and Methods;<br>Patients                                                        |
| <b>Setting and location</b>          | 6   | Provide relevant contextual information that may influence findings.                                                            | Materials and Methods;<br>Study Design                                                    |
| <b>Comparators</b>                   | 7   | Describe the interventions or strategies being compared and why chosen.                                                         | Materials and Methods;<br>Study Design                                                    |
| <b>Perspective</b>                   | 8   | State the perspective(s) adopted by the study and why chosen.                                                                   | Materials and Methods;<br>Study Design                                                    |
| <b>Time horizon</b>                  | 9   | State the time horizon for the study and why appropriate.                                                                       | Materials and Methods;<br>Model Structure                                                 |
| <b>Discount rate</b>                 | 10  | Report the discount rate(s) and reason chosen.                                                                                  | Materials and Methods;<br>Model Structure                                                 |
| <b>Selection of outcomes</b>         | 11  | Describe what outcomes were used as the measure(s) of benefit(s) and harm(s).                                                   | Materials and Methods;<br>Model Structure                                                 |
| <b>Measurement of outcomes</b>       | 12  | Describe how outcomes used to capture benefit(s) and harm(s) were measured.                                                     | Materials and Methods;<br>Transition Probabilities,<br>Adverse Events, QALY<br>Estimation |

| Topic                                                                        | No. | Item                                                                                                                                                                          | Location where item is reported        |
|------------------------------------------------------------------------------|-----|-------------------------------------------------------------------------------------------------------------------------------------------------------------------------------|----------------------------------------|
| <b>Valuation of outcomes</b>                                                 | 13  | Describe the population and methods used to measure and value outcomes.                                                                                                       | Materials and Methods; Patients        |
| <b>Measurement and valuation of resources and costs</b>                      | 14  | Describe how costs were valued.                                                                                                                                               | Materials and Methods; Cost Estimation |
| <b>Currency, price date, and conversion</b>                                  | 15  | Report the dates of the estimated resource quantities and unit costs, plus the currency and year of conversion.                                                               | Materials and Methods; Cost Estimation |
| <b>Rationale and description of model</b>                                    | 16  | If modelling is used, describe in detail and why used. Report if the model is publicly available and where it can be accessed.                                                | Materials and Methods; Model Structure |
| <b>Analytics and assumptions</b>                                             | 17  | Describe any methods for analysing or statistically transforming data, any extrapolation methods, and approaches for validating any model used.                               | Materials and Methods; Analysis        |
| <b>Characterising heterogeneity</b>                                          | 18  | Describe any methods used for estimating how the results of the study vary for subgroups.                                                                                     | Not applicable                         |
| <b>Characterising distributional effects</b>                                 | 19  | Describe how impacts are distributed across different individuals or adjustments made to reflect priority populations.                                                        | Not reported                           |
| <b>Characterising uncertainty</b>                                            | 20  | Describe methods to characterise any sources of uncertainty in the analysis.                                                                                                  | Materials and Methods; Analysis        |
| <b>Approach to engagement with patients and others affected by the study</b> | 21  | Describe any approaches to engage patients or service recipients, the general public, communities, or stakeholders (such as clinicians or payers) in the design of the study. | Not reported                           |
| <b>Results</b>                                                               |     |                                                                                                                                                                               |                                        |
| <b>Study parameters</b>                                                      | 22  | Report all analytic inputs (such as values, ranges, references) including uncertainty or distributional assumptions.                                                          | Table 1, Supplementary table 1         |
| <b>Summary of main results</b>                                               | 23  | Report the mean values for the main categories of costs and outcomes of interest and summarise them in the most appropriate overall measure.                                  | Table 2, Figure 3                      |
| <b>Effect of uncertainty</b>                                                 | 24  | Describe how uncertainty about analytic judgments, inputs, or projections affect findings. Report the effect of choice of discount rate and time horizon, if applicable.      | Table 3,4 Figure 4,5                   |

| Topic                                                                       | No. | Item                                                                                                                                                    | Location where item is reported |
|-----------------------------------------------------------------------------|-----|---------------------------------------------------------------------------------------------------------------------------------------------------------|---------------------------------|
| <b>Effect of engagement with patients and others affected by the study</b>  | 25  | Report on any difference patient/service recipient, general public, community, or stakeholder involvement made to the approach or findings of the study | Not reported                    |
| <b>Discussion</b>                                                           |     |                                                                                                                                                         |                                 |
| <b>Study findings, limitations, generalisability, and current knowledge</b> | 26  | Report key findings, limitations, ethical or equity considerations not captured, and how these could affect patients, policy, or practice.              | Discussion, Limitation          |
| <b>Other relevant information</b>                                           |     |                                                                                                                                                         |                                 |
| <b>Source of funding</b>                                                    | 27  | Describe how the study was funded and any role of the funder in the identification, design, conduct, and reporting of the analysis                      | Title page(s)                   |
| <b>Conflicts of interest</b>                                                | 28  | Report authors conflicts of interest according to journal or International Committee of Medical Journal Editors requirements.                           | Title page(s)                   |

**Supplementary Table S2. Health Insurance Claims and Total Healthcare Costs for Adverse Events in South Korea in 2021**

|                                                                                                                                                       | Number of health insurance claims | Total Healthcare Cost (KRW 1,000) |
|-------------------------------------------------------------------------------------------------------------------------------------------------------|-----------------------------------|-----------------------------------|
| <b>Injection site reaction</b>                                                                                                                        |                                   |                                   |
| 피부 및 피하조직의 국소적 부기, 종괴 및 덩이 (R22)<br>Localized swelling, masses, and lumps in the skin and subcutaneous tissue                                         | 211                               | 8,337                             |
| <b>Allergic conjunctivitis</b>                                                                                                                        |                                   |                                   |
| 급성 아토피결막염 (H101)<br>Acute Atopic Conjunctivitis                                                                                                       | 2,821,890                         | 70,910,574                        |
| <b>Infectious conjunctivitis</b>                                                                                                                      |                                   |                                   |
| 아데노바이러스에 의한 각막결막염(B300)<br>Adenoviral keratoconjunctivitis                                                                                            | 90,691                            | 22,296                            |
| 아데노바이러스에 의한 결막염(B301)<br>Conjunctivitis caused by adenovirus                                                                                          | 11,975                            | 23,052                            |
| 기타 바이러스결막염(B308)<br>Other viral conjunctivitis                                                                                                        | 11,880                            | 20,660                            |
| 상세불명의 바이러스결막염(B309)<br>Unspecified viral conjunctivitis                                                                                               | 15,390                            | 20,203                            |
| 달리 분류된 기타 감염성 및 기생충 질환에서의 각막염 및 각막결막염(H131)<br>Keratitis and keratoconjunctivitis in other infectious and parasitic diseases not elsewhere classified | 25,874                            | 25,400                            |
| 급성 유행성 출혈성 결막염(엔테로바이러스)(B303)<br>Acute epidemic hemorrhagic conjunctivitis (Enterovirus)                                                              | 1,464                             | 21,077                            |

### Supplementary Information S1. Future price reduction scenario based on the EPED policy

In this study, we reexamine the mathematical framework introduced by Shih et al.<sup>i</sup> and Guertin et al.<sup>ii</sup> Let,

T = end of the model's time horizon

$C_j(t)$  = mean total cost of the treatment j at time t

$ND_j(t)$  = mean nondrug costs of the treatment j at time t

$P_j(t)$  = price of the treatment j at time t

$Q_j(t)$  = mean total quantity of the treatment j consumed at time t

$E_j(t)$  = mean effectiveness of the treatment j at time t

r = discount rate

j = 1 if new drug or 0 if the comparator drug or supportive care

$\Delta C$  = incremental cost when ignoring the future price reduction

$\Delta C'$  = incremental cost when considering the future price reduction

$\Delta E$  = incremental effectiveness when ignoring the future price reduction

$\Delta E'$  = incremental effectiveness when considering the future price reduction

ICER = ICER when ignoring the future price reduction

ICER' = ICER when considering the future price reduction

When ignoring the EPED adjustment after generic entry, the price of the originator will remain constant throughout the observation timeline ( $P_1(t) = P_1$ ). This leads to the estimation of the incremental cost, incremental effectiveness, and incremental cost-effectiveness ratio (ICER) as follows:

$$\Delta C = \sum_{t=0}^T \frac{P_1(t) \cdot Q_1(t)}{(1+r)^t} - \sum_{t=0}^T \frac{P_0(t) \cdot Q_0(t)}{(1+r)^t} + \sum_{t=0}^T \frac{ND_1(t) - ND_0(t)}{(1+r)^t}$$
$$\Delta E = \sum_{t=0}^T \frac{E_1(t) - E_0(t)}{(1+r)^t}$$
$$ICER = \frac{\Delta C}{\Delta E}$$

With the assumption of EPED adjustment, it is hypothesized that the price of the new drug would be subjected to a price reduction within the observation period ( $T^* < T$ ), while the comparator drug, which already experienced price reduction, would not be affected by such change ( $P_0(t) = P_0$ ).

Then new drug price ( $P_1$ ) can be defined as:

$$\begin{aligned} \text{Biological drugs : } P_1(t) &= \begin{cases} P_1 & (t < T^*) \\ 0.7 * P_1 & (t \geq T^*) \end{cases} \\ \text{Chemical drugs : } P_1(t) &= \begin{cases} P_1 & (t < T^*) \\ 0.7 * P_1 & (T^* \leq t < T^* + 12 \text{ month}) \\ 0.5355 * P_1 & (t \geq T^* + 12 \text{ months}) \end{cases} \end{aligned}$$

Subsequently, the incremental cost, incremental effectiveness and ICER will be recalculated based on the EPED adjusted price of the new drug and the comparator drug. Incremental cost reflecting cost reduction ( $\Delta C'$ ) will vary from  $\Delta C$  while the effectiveness remains the same. ( $\Delta E = \Delta E'$ ). For example,  $\Delta C'$  for the biologic drugs can be defines as:

$$\begin{aligned} \Delta C' &= \sum_{t=0}^{T^*-1} \frac{P_1(t) \cdot Q_1(t)}{(1+r)^t} + \sum_{t=T^*}^T \frac{0.7P_1(t) \cdot Q_1(t)}{(1+r)^t} - \sum_{t=0}^T \frac{P_0(t) \cdot Q_0(t)}{(1+r)^t} \\ &+ \sum_{t=0}^T \frac{ND_1(t) - ND_0(t)}{(1+r)^t} \end{aligned}$$

Since  $P_{1P} \geq 0$  and  $Q_1(t) \geq 0$ , the difference between  $\Delta C$  and  $\Delta C'$  is always nonnegative, which can be presented as:

$$\Delta C - \Delta C' = \sum_{t=T^*}^T \frac{0.3P_1 \cdot Q_1(t)}{(1+r)^t} \geq 0$$

In conclusion, pre-EPED ICER is larger than or equal to post-EPED ICER because of the following formula:

$$\text{ICER} = \frac{\Delta C}{\Delta E} \geq \frac{\Delta C'}{\Delta E'} = \text{ICER}'$$

---

<sup>i</sup> Shih, Y.-C. T., Han, S. & Cantor, S. B. Impact of Generic Drug Entry on Cost-Effectiveness Analysis. *Med Decis Making* **25**, 71–80 (2005).

<sup>ii</sup> Guertin, J. R., Mitchell, D., Ali, F. & LeLorier, J. Bias within economic evaluations – the impact of considering the future entry of lower-cost generics on currently estimated incremental cost-effectiveness ratios of a new drug. *Clinicoecon Outcomes Res* **7**, 497–503 (2015).
